# Supplementary material for: One size does not fit all: data-driven insights of patient-reported outcomes to tailor supportive care in breast cancer
Source: Research Square preprint supplement (doi:10.21203/rs.3.rs-7630614/v1), 2025-10-24
Supplement: Supplementary file 1 [file 95d4759c8b89526274c074e0.docx]

**Data supplement

Table 2: Health Related Quality of Life domains (QLQ-C30 & BR23-module) per subgroup**

| **Subdomain** | **Thresholds for clinical importance [56]** | **Overall** | **Excellent HRQoL** | | **Psychosocial concerns** | **Poor HRQoL with severe limitations in functioning** |
| --- | --- | --- | --- | --- | --- | --- |
| N = 2,1811 | N = 1,1731 | | N = 7231 | N = 2851 |
| **Quality of Life total** |  | 75.19 (17.92) | 85.49 (11.48) | | 67.70 (13.97) | 51.75 (17.08) |
| **Physical Functioning** | 83 | 89.07 (15.01) | 96.08 (7.15) | | 86.34 (13.06) | 67.15 (19.49) |
| **Role Functioning** | 58 | 80.90 (25.12) | 95.99 (9.62) | | 72.20 (20.89) | 40.88 (24.72) |
| **Emotional Functioning** | 71 | 72.26 (21.12) | 82.79 (14.04) | | 63.54 (19.46) | 51.07 (23.34) |
| **Cognitive Functioning** | 75 | 81.71 (21.79) | 93.36 (11.88) | | 74.78 (18.72) | 51.35 (23.72) |
| **Social Functioning** | 58 | 82.87 (22.46) | 96.15 (9.32) | | 74.83 (18.45) | 48.60 (23.98) |
| **Fatigue** | 61 | 71.62 (23.75) | 86.03 (13.18) | | 64.08 (15.95) | 31.44 (18.60) |
| **Nausea/Vomiting** | 92 | 94.89 (11.85) | 98.76 (4.88) | | 94.47 (10.20) | 80.00 (20.74) |
| **Pain** | 75 | 81.71 (22.00) | 92.63 (11.70) | | 77.34 (18.15) | 47.89 (25.01) |
| **Dyspnea** | 83 | 88.58 (19.49) | 95.08 (12.53) | | 86.08 (19.84) | 68.19 (25.67) |
| **Sleep Disturbances** | 50 | 68.75 (28.08) | 80.28 (21.23) | | 58.92 (27.38) | 46.20 (31.37) |
| **Appetite Loss** | 50 | 90.17 (19.28) | 96.96 (9.70) | | 86.95 (20.77) | 70.41 (27.58) |
| **Constipation** | 50 | 89.38 (20.83) | 94.66 (14.31) | | 87.64 (21.44) | 72.05 (29.90) |
| **Diarrhea** | 83 | 92.31 (17.70) | 95.82 (12.41) | | 91.01 (18.67) | 81.17 (26.54) |
| **Financial Impact** | 83 | 92.47 (18.36) | 97.64 (9.50) | | 89.53 (20.30) | 78.60 (29.04) |
| **Systemic Therapy Side Effects** |  | 86.34 (14.76) | 93.33 (8.13) | | 83.04 (12.38) | 65.89 (18.97) |
| **Upset by Hair Loss** |  | 21.72 (25.49) | 16.23 (20.07) | | 24.48 (27.09) | 37.31 (32.74) |
| **Arm Symptoms** |  | 88.98 (16.33) | 94.30 (10.68) | | 86.48 (16.32) | 73.41 (22.90) |
| **Breast Symptoms** |  | 81.42 (17.69) | 87.76 (12.57) | | 76.76 (17.88) | 67.15 (22.60) |
| **Body Image** |  | 84.00 (21.05) | 93.42 (11.16) | | 76.00 (22.63) | 65.54 (26.69) |
| **Future Perspective** |  | 54.84 (27.63) | 65.02 (23.19) | | 45.55 (27.51) | 36.49 (27.01) |
| **Sexual Functioning** |  | 20.76 (20.55) | 23.57 (21.27) | | 18.42 (19.18) | 15.09 (19.03) |
| **Sexual Enjoyment** |  | 42.30 (28.64) | 46.21 (28.45) | | 39.51 (28.70) | 33.33 (26.39) |
|
|  | *1 Mean* (SD) | | |

*NB: All scores are transformed into 0 = low quality of life or high symptom burden, 100 = high quality of life or low symptom burden.*

**Table 3: Goodness of fit indices for 1 – 7 classes at baseline**

Model Classes AIC BIC Entropy prob_min prob_max n_min n_max BLRT_p

1 1 373636.26 373889.94 1.00 1.00 1.00 1.00 1.00 0.01

1 2 364515.83 364901.87 0.94 0.97 0.99 0.27 0.73 0.01

**1 3 362142.40 362660.79 0.91 0.93 0.97 0.12 0.56 0.01**

1 4 361857.98 362508.73 0.82 0.82 0.96 0.11 0.40 0.01

1 5 360869.13 361652.23 0.83 0.72 0.95 0.05 0.33 0.01

1 6 360144.70 361060.16 0.84 0.73 0.97 0.05 0.32 0.01

1 7 359738.37 360786.19 0.83 0.73 0.98 0.04 0.31 0.01

**Table 4 Odds ratios and 95% confidence intervals of factors associated with different subgroups**

|  | | | | | | | | | | | |
| --- | --- | --- | --- | --- | --- | --- | --- | --- | --- | --- | --- |
| Covariate | Cluster Psychosocial Concerns | | | 95% CI | p-value | | Cluster Poor HRQoL | | | 95% CI | p-value |
| (OR) | | | (OR) | | |
| Intercept (ref = Excellent HrQoL) | 0.88 | | | [0.32 - 2.42] | 0.50 | | 1.07 | | | [0.58 - 1.97] | 0.049 |
| Cardiac history | 0.95 | | | [0.64 - 1.41] | 0.860 | | 1.07 | | | [0.72 - 1.59] | 0.340 |
| Stroke | 2.76 | | | [0.44 - 17.28] | 0.550 | | 1.90 | | | [0.4 - 9.02] | 0.720 |
| Hypertension | 1.15 | | | [0.87 - 1.52] | 0.140 | | 1.16 | | | [0.58 - 2.32] | 0.055 |
| Respiratory diseases | 0.89 | | | [0.64 - 1.24] | 0.015 | | 1.17 | | | [0.87 - 1.57] | 0.015 |
| Diabetes | 0.70 | | | [0.45 - 1.08] | 0.230 | | 0.68 | | | [0.39 - 1.18] | 0.280 |
| Stomach ulcer | 1.36 | | | [0.15 - 12.3] | 0.960 | | 2.62 | | | [0.36 - 19] | 1.000 |
| Kidney diseases | 0.82 | | | [0.41 - 1.63] | 0.360 | | 0.79 | | | [0.33 - 1.88] | 0.430 |
| Liver diseases | 1.29 | | | [0.67 - 2.47] | 0.340 | | 0.75 | | | [0.32 - 1.75] | 0.420 |
| Blood diseases | 1.34 | | | [0.87 - 2.06] | 0.011 | | 1.83 | | | [1.23 - 2.73] | 0.411 |
| Thyroid diseases | 1.19 | | | [0.81 - 1.74] | 0.180 | | 1.13 | | | [0.77 - 1.66] | 0.200 |
| **Depression** | **2.58** | | | **[0.37 - 2.91]** | **0.040** | | **2.59** | | | **[1.09 - 3.32]** | **<0.001** |
| Arthritis | 0.97 | | | [0.73 - 1.29] | 0.130 | | 1.04 | | | [0.78 - 1.39] | 0.140 |
| Back pain | 0.59 | | | [0.47 - 0.74] | 0.001 | | 1.12 | | | [0.9 - 1.39] | 0.110 |
| Rheumatic arthritis | 0.89 | | | [0.54 - 1.47] | 0.250 | | 1.37 | | | [0.89 - 2.11] | 0.220 |
| **Multiple comorbidities (>3)** | **3.80** | | | **[2.85 – 6.85]** | **<0.001** | | **5.61** | | | **[3.10 – 8.23]** | **<0.001** |
| (ref = none) |
| **Marital status** | 1.00 | | | [0.92 – 1.08] | 0.400 | | **3.98** | | | **[2.81 – 5.87]** | **0.042** |
| (ref = married or living together) |
| **Socio-economic status** | 1.00 | | | [0.91 – 1.12] | 0.400 | | **1.98** | | | **[1.03 – 9.87]** | **0.039** |
| (ref = lower than average) |
| **Education status** | 1.17 | | | [1.05 - 1.3] | 0.056 | | 0.92 | | | [0.82 - 1.95] | 0.057 |
| (ref = university degree ) |
| Age (years) | 1.00 | | | [0.99 - 1.01] | 0.820 | | 1.00 | | | [0.99 - 1] | 0.670 |
| Smoking | 1.00 | | | [0.91 - 1.1] | 0.490 | | **1.11** | | | **[1 - 1.23]** | **0.050** |
| Alcohol use | 0.94 | | | [0.79 - 1.1] | 0.350 | | 0.91 | | | [0.76 - 1.09] | 0.370 |
| WHO status | 1.08 | | | [0.91 - 1.29] | 0.300 | | 1.06 | | | [0.87 - 1.29] | 0.620 |
| **BMI** | **0.98** | | | **[0.96 - 0.99]** | **0.019** | | **2.68** | | | **[2.66 - 2.99]** | **0.020** |
| **Menopausal status** | 1.09 | | | [0.91 - 1.3] | 0.085 | | **2.77** | | | **[2.65 - 2.91]** | **<0.001** |
| **Neo-adjuvant chemotherapy** | **1.69** | | | **[1.56 - 1.98]** | **0.012** | | 1.16 | | | [0.90 - 1.56] | 0.128 |
| **Adjuvant chemotherapy** | **1.72** | | | **[1.54 - 1.96]** | **0.014** | | 1.19 | | | [0.92 - 1.54] | 0.140 |
| Adjuvant immunotherapy | 1.19 | | | [0.81 - 1.76] | 0.200 | | 1.37 | | | [0.88 - 2.13] | 0.310 |
| Adjuvant hormonal therapy | 0.78 | | | [0.63 - 0.96] | 0.013 | | 0.97 | | | [0.75 - 1.25] | 0.800 |
| Adjuvant radiotherapy | 1.16 | | | [0.95 - 1.42] | 0.100 | | 0.90 | | | [0.71 - 1.14] | 0.470 |
| Type of surgery | 1.15 | | | [0.88 - 1.5] | 0.360 | | 1.20 | | | [0.92 - 1.57] | 0.360 |
| (ref = axillary dissection) |
| Her2-status | 0.87 | | | [0.66 - 1.15] | 0.310 | | 0.91 | | | [0.62 - 1.33] | 0.600 |
| PR-status | 1.20 | | | [0.92 - 1.57] | 0.034 | | 1.47 | | | [1.09 - 1.99] | 0.008 |
| ER-status | **0.73** | | | **[**0.54 - 0.99] | **0.040** | | **1.01** | | | **[**0.74 - 1.39] | **0.930** |
| Hormone **Receptor Status** | 0.83 | | | [0.69 - 1.01] | 0.037 | | 0.92 | | | [0.76 - 1.12] | 0.036 |
| (ref **= negative)** |
| T | 1.05 | | | [0.91 - 1.2] | 0.520 | | 1.05 | | | [0.91 - 1.21] | 0.540 |
| N | 0.79 | | | [0.41 - 1.53] | 0.570 | | 0.57 | | | [0.41 - 1.53] | 0.591 |
| Grade | | 1.15 | [0.88 - 1.17] | | | 0.580 | | 1.05 | [0.91 - 1.19] | | 0.590 |
| *Covariates in bold indicate a significant* | | *association.* | | | |  | |  |  | |  |

**Table 5 Odds ratios and 95% confidence intervals of factors associated with transition**

|  | Transition from Excellent HRQoL 🡪 Psychosocial concerns | | | Transition from Psychosocial concerns 🡪 Low HRQoL | | |
| --- | --- | --- | --- | --- | --- | --- |
| **Variable** | **OR** | **95 CI%** | **p-value** | **OR** | **95 CI%** | **p-value** |
| Intercept | 0.0001 | 0.00001-0.0003 | < 0.001 | 0.0002 | (0.00001-0.001) | < 0.001 |
| Cardiac history | 1.32 | 0.64-2.72 | 0.47 | 1.18 | (0.49-2.84) | 0.70 |
| Stroke | 9.14 | 0.62-14.48 | 0.16 | 5.22 | (0.19-13.63) | 0.21 |
| Hypertension | 0.79 | (0.45-1.39) | 0.42 | 0.89 | (0.50-1.58) | 0.70 |
| Respiratory diseases | 0.80 | (0.44-1.46) | 0.48 | 1.19 | (0.65-2.17) | 0.60 |
| Diabetes | 2.31 | (0.77-6.89) | 0.14 | 1.07 | (0.32-3.61) | 0.91 |
| Stomach ulcer | 3.84 | (0.15-9.75) | 0.42 | 13.36 | (0.44-12.84) | 0.021 |
| Kidney diseases | 0.63 | (0.15-2.66) | 0.52 | 2.38 | (0.69-8.18) | 0.16 |
| Liver diseases | 2.70 | (0.004-18.65) | 0.72 | 1.39 | (0.01-14.19) | 0.87 |
| Blood diseases | 1.12 | (0.51-2.46) | 0.78 | 1.21 | (0.55-2.69) | 0.63 |
| Thyroid diseases | 2.06 | (0.99-4.29) | 0.053 | 1.51 | (0.69-3.32) | 0.30 |
| **Depression** | **4.94** | **(2.31-10.58)** | **<0.001** | **4.62** | **(1.94-11.00)** | **<0.001** |
| Arthritis | 0.62 | (0.37-1.04) | 0.071 | 0.77 | (0.44-1.35) | 0.38 |
| **Back pain** | **2.00** | **(1.32-3.03)** | **<0.001** | **1.66** | **(1.04-2.66)** | **0.036** |
| Rheumatic arthritis | 2.87 | (0.96-8.58) | 0.058 | 2.88 | (0.96-8.64) | 0.057 |
| Marital status  (ref = married/living together) | 0.88 | (0.70-1.10) | 0.25 | 0.85 | (0.67-1.07) | 0.15 |
| **Education status**  (ref = university degree) | 0.87 | (0.71-1.07) | 0.20 | **0.77** | **(0.61-0.96)** | **0.024** |
| Age | 0.99 | (0.97-1.01) | 0.31 | 0.99 | (0.97-1.02) | 0.61 |
| Smoking | 1.07 | (0.89-1.28) | 0.50 | 1.06 | (0.86-1.31) | 0.55 |
| Alcohol use | 1.10 | (0.79-1.53) | 0.58 | 1.25 | (0.89-1.76) | 0.20 |
| WHO status | 0.97 | (0.72-1.30) | 0.82 | 1.05 | (0.78-1.41) | 0.76 |
| BMI | 1.00 | (0.97-1.03) | 0.93 | 1.00 | (0.96-1.04) | 0.84 |
| Menopausal status | 0.86 | (0.63-1.17) | 0.33 | **0.64** | **(0.45-0.91)** | **0.011** |
| Adjuvant chemotherapy | 1.27 | (0.72-2.24) | 0.42 | 1.22 | (0.70-2.12) | 0.51 |
| Neo adjuvant chemotherapy | 0.96 | (0.65-1.43) | 0.86 | 0.84 | (0.53-1.33) | 0.48 |
| Adjuvant immunotherapy | 0.70 | (0.36-1.38) | 0.31 | 0.79 | (0.22-2.82) | 0.72 |
| Adjuvant hormonal therapy | 0.83 | (0.56-1.24) | 0.38 | 1.08 | (0.68-1.71) | 0.76 |
| Adjuvant radiotherapy | 1.07 | (0.72-1.60) | 0.74 | 0.89 | (0.57-1.40) | 0.63 |
| Type of surgery  (ref = axillary dissection) | 0.79 | (0.54-1.16) | 0.20 | 0.86 | (0.58-1.28) | 0.48 |
| Her2neu-status | 1.47 | (0.88-2.46) | 0.14 | 1.06 | (0.33-3.43) | 0.92 |
| PR-status | 1.12 | (0.66-1.89) | 0.67 | 1.04 | (0.58-1.88) | 0.89 |
| ER-status | 1.07 | (0.60-1.92) | 0.81 | **2.82** | **(1.55-5.12)** | **< 0.001** |
| Hormone receptor status  (ref = negative) | 1.17 | (0.83-1.65) | 0.36 | 1.03 | (0.73-1.45) | 0.89 |
| T | 0.91 | (0.65-1.29) | 0.63 | 0.94 | (0.65-1.36) | 0.76 |
| N | 1.29 | (0.95-1.76) | 0.10 | **1.39** | **(1.02-1.89)** | **0.037** |
| M | 0.62 | (0.13-2.95) | 0.57 | 1.01 | (0.19-5.39) | 0.99 |
| Grade | 1.26 | (0.72-2.19) | 0.43 | 0.87 | (0.47-1.61) | 0.64 |
| Socio-economic status | 0.66 | (0.19-2.31) | 0.80 | 1.56 | (0.46-5.26) | 0.79 |
| (ref = lower than average) |  |  |  |  |  |  |
| Amount of comorbidities | 1.06 | (0.90-1.25) | 0.52 | 1.08 | (0.95-1.24) | 0.26 |

Network analysis


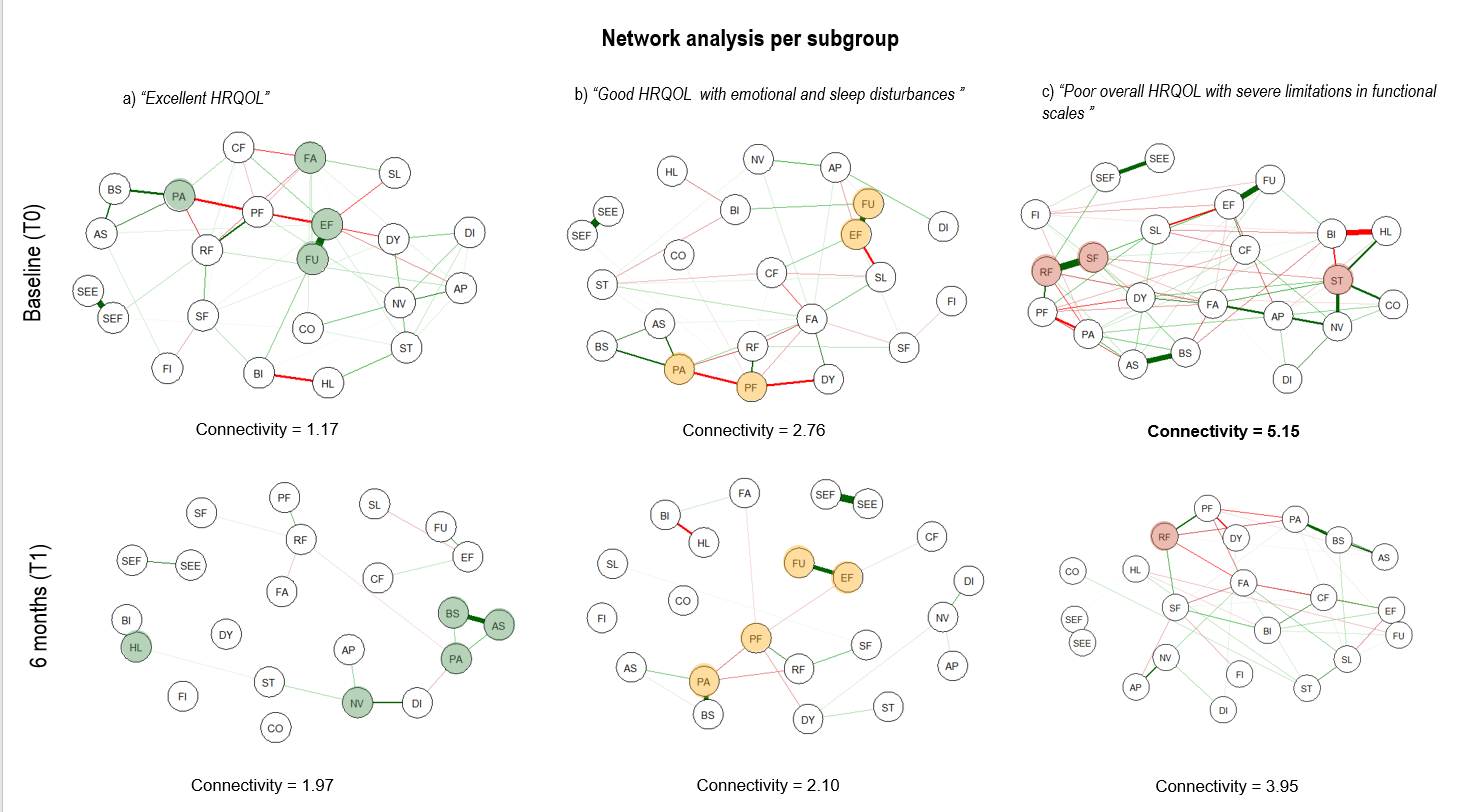


**Figure 6:** Overview of network structures per subgroup

***Interpretation:*** *Networks constructed at baseline (T0) and after 6 months (T1). Networks constructed via graphical LASSO visualizing the regularized partial correlations between items in different subgroups. Green edges represent positive partial correlations and red edges negative ones. Thicker and more saturated edges represent stronger partial correlations. Edges with absolute weight above 0.05 are displayed. The distance between two nodes reflects the absolute edge weight between them (Fruchterman–Reingold layout). Highlighted symptoms represent the symptoms with the highest strength.*

***Legend:*** *Green = Excellent HRQOL, yellow = Good HRQoL with Psychosocial concerns, red = Poor HRQoL with severe limitations in functioning domains;*

***Abbreviations:*** *QL = Quality of life total, PF = Physical Functioning, RF = Role Functioning, EF = Emotional Functioning, CF = Cognitive Functioning, SF = Social Functioning, FA = Fatigue, NV = Nausea/Vomiting, PA = Pain, DY = Dyspnoea, SL = Sleep Disturbances, AP = Appetite Loss, CO = Constipation, DI = Diarrhoea, FI = Financial Impact; ST = Systemic Therapy Side Effects/Hormonal Symptoms, HL= Hair Loss, AS = Arm Symptoms, BS = Breast Symptoms, BI= Body Image, FU = Future Perspective, SEF = Sexual Functioning, SEE = Sexual Enjoyment.*


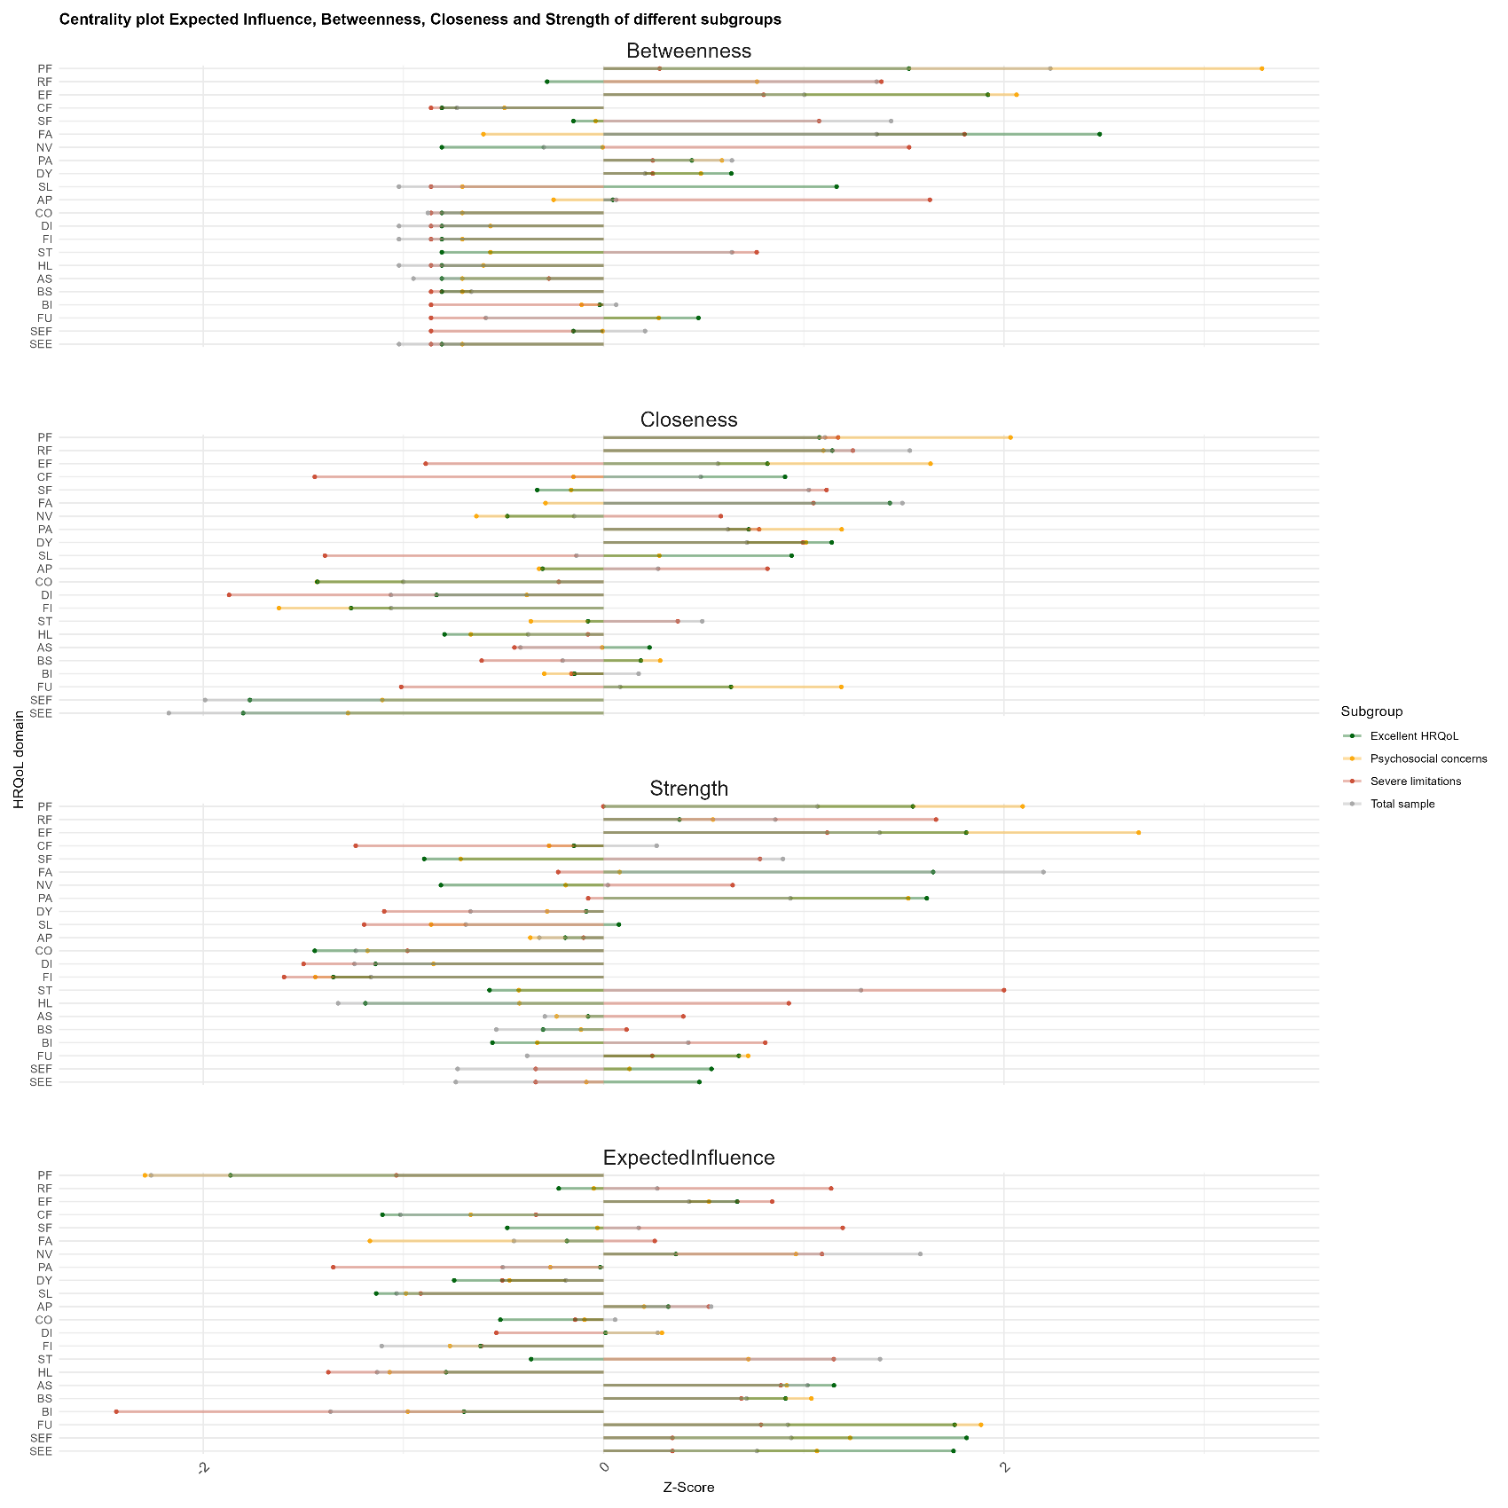


**Figure 7:** Centrality measures (betweenness, closeness, strength, expected influence) per subgroup.***Legend:*** *Green = Excellent HRQOL, yellow = Good HRQoL with Psychosocial concerns, red = Poor HRQoL with severe limitations in functioning domains;
Items in bold indicate a significant difference. Betweenness, closeness, strength and expected influence are displayed by Z-scores.*

***Abbreviations:*** *QL = Quality of life total, PF = Physical Functioning, RF = Role Functioning, EF = Emotional Functioning, CF = Cognitive Functioning, SF = Social Functioning, FA = Fatigue, NV = Nausea/Vomiting, PA = Pain, DY = Dyspnoea, SL = Sleep Disturbances, AP = Appetite Loss, CO = Constipation, DI = Diarrhoea, FI = Financial Impact; ST = Systemic Therapy Side Effects/Hormonal symptoms, HL= Hair Loss, AS = Arm Symptoms, BS = Breast Symptoms, BI= Body Image, FU = Future Perspective, SEF = Sexual Functioning, SEE = Sexual Enjoyment.*

**Supplement: Outcomes of Independent groups Gaussian network comparison test**

*1..Severe limitations vs Excellent HRQoL-subgroup*
INDEPENDENT GROUPS GAUSSIAN NETWORK COMPARISON TEST

P-VALUE CORRECTION: none

NETWORK INVARIANCE TEST

Test statistic M: 4.0340572

p-value 0.0001218781

GLOBAL STRENGTH INVARIANCE TEST

Global strength per group: 5.153191 1.975892

Test statistic S: 0.282299

p-value 0.0170999001

CENTRALITY INVARIANCE TEST

Nodes tested: PF RF EF CF SF FA NV PA DY SL AP CO DI FI ST HL AS BS BI FU SEF SEE

Centralities tested: strength betweenness closeness

Test statistics C:

strength betweenness closeness

PF 0.710925190 71 7.354960e-04

RF 0.327069699 -14 5.414891e-04

EF 0.527924757 43 NA

CF 0.404875300 3 NA

SF 0.309849692 20 5.853334e-04

FA 0.836349860 78 1.132135e-03

NV -0.009749133 -13 -3.516644e-04

PA 0.417214811 -19 -1.413547e-04

DY 0.442267457 39 NA

SL 0.412332876 29 NA

AP 0.320512385 19 -1.135134e-04

CO 0.136689405 0 NA

DI -0.041070991 -34 -8.045480e-04

FI 0.111453585 0 NA

ST 0.371686685 -18 -1.144942e-04

HL -0.227809504 -11 2.068155e-04

AS 0.026234339 -11 -1.662847e-04

BS 0.072370897 9 5.157345e-05

BI 0.102723817 24 6.036792e-04

FU 0.464981050 40 NA

SEF 0.341708475 20 NA

SEE 0.296057188 0 NA

p-values:

strength betweenness closeness

PF 0.000999001 0.000999001 0.056943057

RF 0.007992008 0.338661339 0.177822178

EF 0.000999001 0.000999001 NA

CF 0.004995005 0.868131868 NA

SF 0.026973027 0.152847153 0.225774226

FA 0.000999001 0.000999001 0.003996004

NV 0.977022977 0.677322677 0.665334665

PA 0.004995005 0.068931069 0.916083916

DY 0.001998002 0.000999001 NA

SL 0.004995005 0.000999001 NA

AP 0.109890110 0.268731269 0.851148851

CO 0.392607393 1.000000000 NA

DI 0.804195804 0.019980020 0.135864136

FI 0.569430569 1.000000000 NA

ST 0.013986014 0.222777223 0.916083916

HL 0.147852148 0.025974026 0.881118881

AS 0.853146853 0.370629371 0.841158841

BS 0.563436563 0.313686314 0.969030969

BI 0.520479520 0.005994006 0.670329670

FU 0.004995005 0.000999001 0.01498501

SEF 0.001998002 0.000999001 NA

SEE 0.022977023 1.000000000 NA

*2.Psychosocial concerns vs Excellent HRQoL-subgroup*

INDEPENDENT GROUPS GAUSSIAN NETWORK COMPARISON TEST

P-VALUE CORRECTION: none

NETWORK INVARIANCE TEST

Test statistic M: 0.2116146

p-value 0.0999001

GLOBAL STRENGTH INVARIANCE TEST

Global strength per group: 2.763135 1.174892

Test statistic S: 0.6606957

p-value 0.01658342

CENTRALITY INVARIANCE TEST

Nodes tested: PF RF EF CF SF FA NV PA DY SL AP CO DI FI ST HL AS BS BI FU SEF SEE

Centralities tested: strength betweenness closeness

Test statistics C:

strength betweenness closeness

PF 0.265418603 21 -9.050364e-05

RF -0.091090227 16 -1.187260e-04

EF 0.392322730 40 2.253604e-04

CF 0.151514574 9 2.305729e-04

SF -0.058675828 4 -2.919156e-04

FA 0.041378350 -30 -1.541668e-04

NV 0.081106520 -7 1.741438e-04

PA -0.007073412 7 -2.429520e-05

DY 0.051526010 0 -4.224923e-06

SL 0.070073511 0 4.669747e-04

AP 0.105670315 0 3.195572e-04

CO 0.069933541 0 NA

DI 0.042428653 15 2.553996e-04

FI 0.012037237 0 NA

ST 0.107927774 53 -6.003717e-06

HL 0.040547938 7 1.501294e-04

AS 0.106643766 0 -2.201338e-05

BS -0.055904472 0 -1.338178e-04

BI -0.048363994 -10 1.091483e-04

FU 0.157083979 17 2.264139e-04

SEF -0.043076074 20 NA

SEE -0.070038110 0 NA

p-values:

strength betweenness closeness

PF 0.032967033 0.634365634 0.8641359

RF 0.556443556 0.439560440 0.7762238

EF 0.006993007 0.107892108 0.5674326

CF 0.385614386 0.095904096 0.5034965

SF 0.646353646 0.620379620 0.3656344

FA 0.726273726 0.197802198 0.7362637

NV 0.380619381 0.803196803 0.6663337

PA 0.947052947 0.840159840 0.9470529

DY 0.573426573 1.000000000 0.9900100

SL 0.457542458 1.000000000 0.2097902

AP 0.222777223 1.000000000 0.4435564

CO 0.465534466 1.000000000 NA

DI 0.662337662 0.038961039 0.4155844

FI 0.902097902 1.000000000 NA

ST 0.217782218 0.001998002 0.9900100

HL 0.761238761 0.328671329 0.7422577

AS 0.253746254 1.000000000 0.9610390

BS 0.497502498 1.000000000 0.6953047

BI 0.764235764 0.556443556 0.8531469

FU 0.273726274 0.348651349 0.5274725

SEF 0.513486513 0.053946054 NA

SEE 0.326673327 1.000000000 NA

*3. Psychosocial concerns vs Excellent HRQoL-subgroup*

P-VALUE CORRECTION: none

NETWORK INVARIANCE TEST

Test statistic M: 0.2115587

p-value 0.1038961

GLOBAL STRENGTH INVARIANCE TEST

Global strength per group: 3.988824 2.324266

Test statistic S: 1.664559

p-value 0.4175824

CENTRALITY INVARIANCE TEST

Nodes tested: PF RF EF CF SF FA NV PA DY SL AP CO DI FI ST HL AS BS BI FU SEF SEE

Centralities tested: strength betweenness closeness

Test statistics C:

strength betweenness closeness

PF 0.57730752 81 0.0016706854

RF 0.04260999 -23 0.0012776851

EF 0.54727904 31 0.0017742422

CF 0.25980438 6 0.0011148517

SF -0.09727850 -37 0.0007781484

FA 0.19759713 -74 0.0007340620

NV 0.02743241 -49 0.0006526222

PA 0.47112003 5 0.0013760332

DY 0.23907229 2 0.0012746638

SL 0.13436805 0 0.0012840849

AP 0.09015965 -59 0.0007507204

CO 0.04113467 0 0.0004311166

DI 0.17683935 4 0.0010747840

FI 0.06968372 0 NA

ST -0.19961544 -43 0.0007920721

HL -0.05670591 3 0.0007273635

AS 0.05087729 -17 0.0010439964

BS 0.11318887 0 0.0011842130

BI -0.02297737 17 0.0008885383

FU 0.26598462 28 0.0016074083

SEF 0.22251464 20 NA

SEE 0.17872086 0 NA

p-values:

strength betweenness closeness

PF 0.001998002 0.000999001 0.03796204

RF 0.766233766 0.380619381 0.09690310

EF 0.034965035 0.004995005 NA

CF 0.151848152 0.849150849 0.09290709

SF 0.700299700 0.105894106 0.22577423

FA 0.358641359 0.024975025 0.33166833

NV 0.900099900 0.012987013 0.24875125

PA 0.005994006 0.607392607 0.04795205

DY 0.227772228 0.953046953 0.08091908

SL 0.471528472 1.000000000 NA

AP 0.693306693 0.003996004 0.25774226

CO 0.809190809 1.000000000 NA

DI 0.329670330 0.044955045 NA

FI 0.774225774 1.000000000 NA

ST 0.527472527 0.086913087 0.23376623

HL 0.752247752 0.886113886 NA

AS 0.847152847 0.183816184 0.04995005

BS 0.492507493 1.000000000 0.02697303

BI 0.935064935 0.055944056 NA

FU 0.038961039 0.006993007 NA

SEF 0.101898102 0.559440559 NA

SEE 0.120879121 1.000000000 NA

> summary(NCT_2_3)

*Network comparison test*

P-VALUE CORRECTION: none

NETWORK INVARIANCE TEST

Test statistic M: 0.2794973

p-value 0.008991009

GLOBAL STRENGTH INVARIANCE TEST

Global strength per group: 2.324266 3.739907

Test statistic S: 1.415642

p-value 0.000999001

CENTRALITY INVARIANCE TEST

Nodes tested: PF RF EF CF SF FA NV PA DY SL AP CO DI FI ST HL AS BS BI FU SEF SEE

Centralities tested: strength betweenness closeness

Test statistics C:

strength betweenness closeness

PF -0.470831868 -38 -5.991970e-04

RF 0.007146584 49 -6.094858e-04

EF -0.381774498 -35 -7.873181e-04

CF -0.259754101 0 -8.861932e-04

SF 0.173074298 36 -1.751430e-04

FA -0.523103726 -23 -7.231283e-04

NV 0.136507931 69 -1.979761e-04

PA -0.496247990 -6 -5.423894e-04

DY -0.254545094 -12 -6.410940e-04

SL -0.303899208 -60 -8.896924e-04

AP -0.099623252 46 -2.215807e-04

CO 0.061031690 0 -1.265055e-05

DI -0.074863477 0 -4.086513e-04

FI -0.041106195 0 NA

ST 0.262203800 47 -3.492759e-04

HL 0.257200602 0 -1.881763e-04

AS -0.058816663 17 -5.494604e-04

BS -0.046634833 0 -5.573693e-04

BI 0.101147923 -24 -3.977089e-04

FU -0.245970983 -39 -7.474542e-04

SEF -0.292926700 -20 NA

SEE -0.279497271 0 NA

p-values:

strength betweenness closeness

PF 0.000999001 0.058941059 0.108891109

RF 0.940059940 0.006993007 0.075924076

EF 0.000999001 0.010989011 0.011988012

CF 0.043956044 1.000000000 0.009990010

SF 0.119880120 0.047952048 0.635364635

FA 0.000999001 0.158841159 0.032967033

NV 0.239760240 0.000999001 0.541458541

PA 0.000999001 0.672327672 0.097902098

DY 0.031968032 0.161838162 0.033966034

SL 0.001998002 0.000999001 0.003996004

AP 0.405594406 0.015984016 0.536463536

CO 0.589410589 1.000000000 0.976023976

DI 0.508491508 1.000000000 0.281718282

FI 0.728271728 1.000000000 NA

ST 0.045954046 0.000999001 0.334665335

HL 0.010989011 1.000000000 0.522477522

AS 0.655344655 0.097902098 0.115884116

BS 0.683316683 1.000000000 0.059940060

BI 0.463536464 0.063936064 0.268731269

FU 0.007992008 0.001998002 0.004995005

SEF 0.000999001 0.062937063 NA

SEE 0.000999001 1.000000000 NA

> summary(NCT_1_3)

INDEPENDENT GROUPS GAUSSIAN NETWORK COMPARISON TEST

P-VALUE CORRECTION: none

NETWORK INVARIANCE TEST

Test statistic M: 0.1496325

p-value 0.1418581

GLOBAL STRENGTH INVARIANCE TEST

Global strength per group: 3.988824 3.739907

Test statistic S: 0.2489171

p-value 0.6793207

EDGE INVARIANCE TEST

CENTRALITY INVARIANCE TEST

Nodes tested: PF RF EF CF SF FA NV PA DY SL AP CO DI FI ST HL AS BS BI FU SEF SEE

Centralities tested: strength betweenness closeness

Test statistics C:

strength betweenness closeness

PF 1.064756e-01 43 0.0010714884

RF 4.975657e-02 26 0.0006681993

EF 1.655045e-01 -4 0.0009869241

CF 5.027725e-05 6 0.0002286585

SF 7.579580e-02 -1 0.0006030054

FA -3.255066e-01 -97 0.0000109337

NV 1.639403e-01 20 0.0004546462

PA -2.512796e-02 -1 0.0008336437

DY -1.547281e-02 -10 0.0006335699

SL -1.695312e-01 -60 0.0003943925

AP -9.463603e-03 -13 0.0005291397

CO 1.021664e-01 0 0.0004184661

DI 1.019759e-01 4 0.0006661327

FI 2.857752e-02 0 0.0002891261

ST 6.258836e-02 4 0.0004427963

HL 2.004947e-01 3 0.0005391873

AS -7.939371e-03 0 0.0004945360

BS 6.655404e-02 0 0.0006268437

BI 7.817055e-02 -7 0.0004908294

FU 2.001363e-02 -11 0.0008599542

SEF -7.041206e-02 0 0.0006558126

SEE -1.007764e-01 0 0.0005957185

p-values:

strength betweenness closeness

PF 0.368631369 0.017982018 0.01598402

RF 0.489510490 0.292707293 0.13886114

EF 0.157842158 0.761238761 0.01398601

CF 1.000000000 0.405594406 0.41258741

SF 0.427572428 0.974025974 0.09490509

FA 0.003996004 0.000999001 0.97802198

NV 0.234765235 0.059940060 0.13586414

PA 0.752247752 0.955044955 0.02397602

DY 0.880119880 0.521478521 0.10089910

SL 0.046953047 0.000999001 0.17982018

AP 0.934065934 0.324675325 0.12087912

CO 0.364635365 1.000000000 0.30369630

DI 0.387612388 0.187812188 0.13186813

FI 0.780219780 1.000000000 0.46253746

ST 0.693306693 0.819180819 0.21778222

HL 0.007992008 0.032967033 0.08291708

AS 0.957042957 1.000000000 0.07792208

BS 0.487512488 1.000000000 0.02597403

BI 0.535464535 0.469530470 0.13786214

FU 0.812187812 0.062937063 0.01498501

SEF 0.383616384 1.000000000 NA

SEE 0.191808192 1.000000000 NA
